# Supplementary material for: Anode properties of magnesium hydride catalyzed with niobium oxide for an all solid-state lithium-ion battery
Source: Royal Society of Chemistry journal article supplement (doi:10.1039/c3cc43987a), 2013-01-01
Supplement: c3cc43987a.pdf [file c3cc43987a.pdf]

## Electronic Supplementary Information

### Anode Properties of Magnesium Hydride Catalyzed with Niobium Oxide for All Solid-State Lithium-Ion Battery

Suguru Ikeda,<sup>a</sup> Takayuki Ichikawa,<sup>\*a,b</sup> Koji Kawahito,<sup>a</sup> Kazuhiro Hirabayashi,<sup>a</sup> Hiroki Miyaoka<sup>c</sup> and Yoshitsugu Kojima<sup>a,b</sup>

<sup>a</sup>Graduate School of Advanced Sciences of Matter, Hiroshima University, 1-3-1 Kagamiyama, Higashi-Hiroshima 739-8530, Japan

<sup>b</sup>Institute for Advanced Materials Research, Hiroshima University, 1-3-1 Kagamiyama, Higashi-Hiroshima 739-8530, Japan

<sup>c</sup>Institute for Sustainable Science and Development, Hiroshima University, 1-3-1, Kagamiyama, Higashi-Hiroshima 739-8530, Japan

\*Corresponding author. Fax: +81 82 424 5744; Tel.: +81 82 424 5744.

E-mail address: tichi@hiroshima-u.ac.jp

#### Experimental

The solid electrolyte 80Li<sub>2</sub>S-20P<sub>2</sub>S<sub>5</sub> was synthesized through following procedure. The mixture of Li<sub>2</sub>S (Furuuchi Chemistry, 99.9%) and P<sub>2</sub>S<sub>5</sub> (Sigma Aldrich, 99%) with the molar ratios of 80 : 20 were put into the zirconia vessel (30 ml internal volume) with ten pieces of zirconia balls. Then, the mixture was mechanically milled for 20 h at 370 rpm under 0.1 MPa of argon gas atmosphere using a planetary ball milling apparatus (Fritsch P7). The samples before and after ball milling were always handled in a glove-box filled with a purified Ar gas atmosphere (Miwa MFG). The catalyzed MgH<sub>2</sub>

containing 1 mol% Nb<sub>2</sub>O<sub>5</sub> (Sigma Aldrich, 99.5%) and 99mol% of MgH<sub>2</sub> (Alfa Aesar, 98%) is synthesized by ball-milling for 20h. The anode materials of pristine MgH<sub>2</sub> and catalyzed MgH<sub>2</sub>, solid electrolyte 80Li<sub>2</sub>S-20P<sub>2</sub>S<sub>5</sub>, and acetylene black were mixed with moderate weight ratios. These mixtures were ground and then pressed into 16 mm diameter tablet. The solid electrolyte 80Li<sub>2</sub>S-P<sub>2</sub>S<sub>5</sub> was also pressed into 16 mm diameter tablet. Then, these tablets of the pristine MgH<sub>2</sub>/catalyzed MgH<sub>2</sub> anode and 80Li<sub>2</sub>S-P<sub>2</sub>S<sub>5</sub> solid electrolyte were placed on a lithium metallic disk in the experimental cell (Toyo System Co.). The anode properties of pristine /catalyzed MgH<sub>2</sub> were examined as a cathode against counter electrode of lithium metal. All the procedures were done in the Ar glove box.

The charge and discharge properties were measured by galvanostat (HJ-SM8, Hokuto Denko Co.) at a voltage between 0.1V and 2.3V versus Li<sup>+</sup>/Li, current density of 0.05 mA cm<sup>-2</sup>, temperature of 100 °C and current density 0.005 mA cm<sup>-2</sup>, temperature of 25 °C. The structural characterization was examined by X-ray diffraction measurement (Rigaku, RINT2500) using Cu K $\alpha$  radiation at room temperature. The samples were protected with polyimide film to avoid the oxidation and the adsorption of water during XRD measurement.
